# Supplementary material for: A safer framework to evaluate characterization technologies of exhaled biologic materials using electrospun nanofibers
Source: Royal Society of Chemistry journal article supplement (doi:10.1039/d3nr01859h), 2023-01-01
Supplement: d3nr01859h1.pdf [file d3nr01859h1.pdf]

## Supplementary Material

### A Safer Framework to Evaluate Characterization Technologies of Exhaled Biologic Materials Using Electrospun Nanofibers

David T. Evans, Dalton J. Nelson, Megan E. Pask, and Frederick R. Haselton\*

---

*\*Department of Biomedical Engineering, 5824 Stevenson Center, Vanderbilt University, Nashville, TN 37232, USA. Email: rick.haselton@vanderbilt.edu*

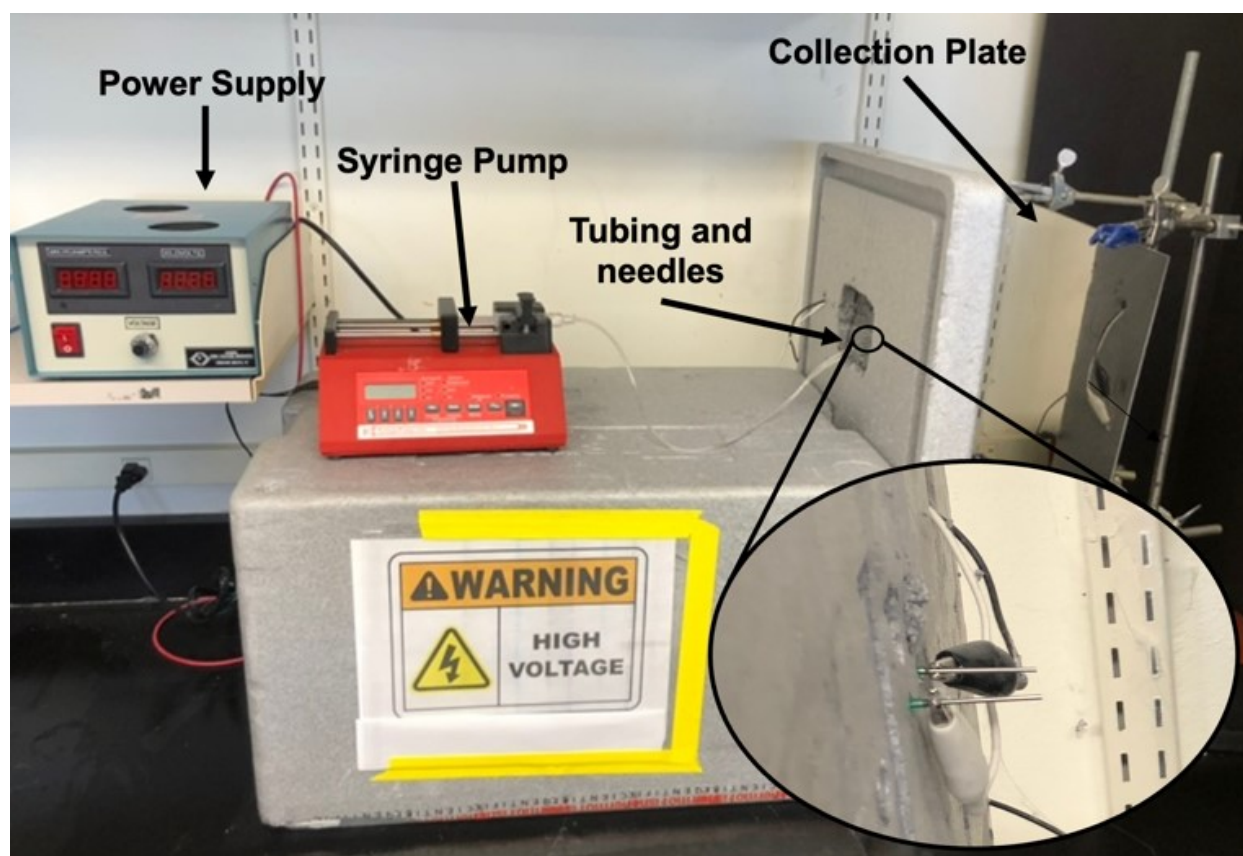

**Fig. S1** The electrospinning process set-up used to make the mask inserts. It is designed to form fibrous substrates of PVA by slowly extruding a polymer solution through a needle while applying a high voltage.

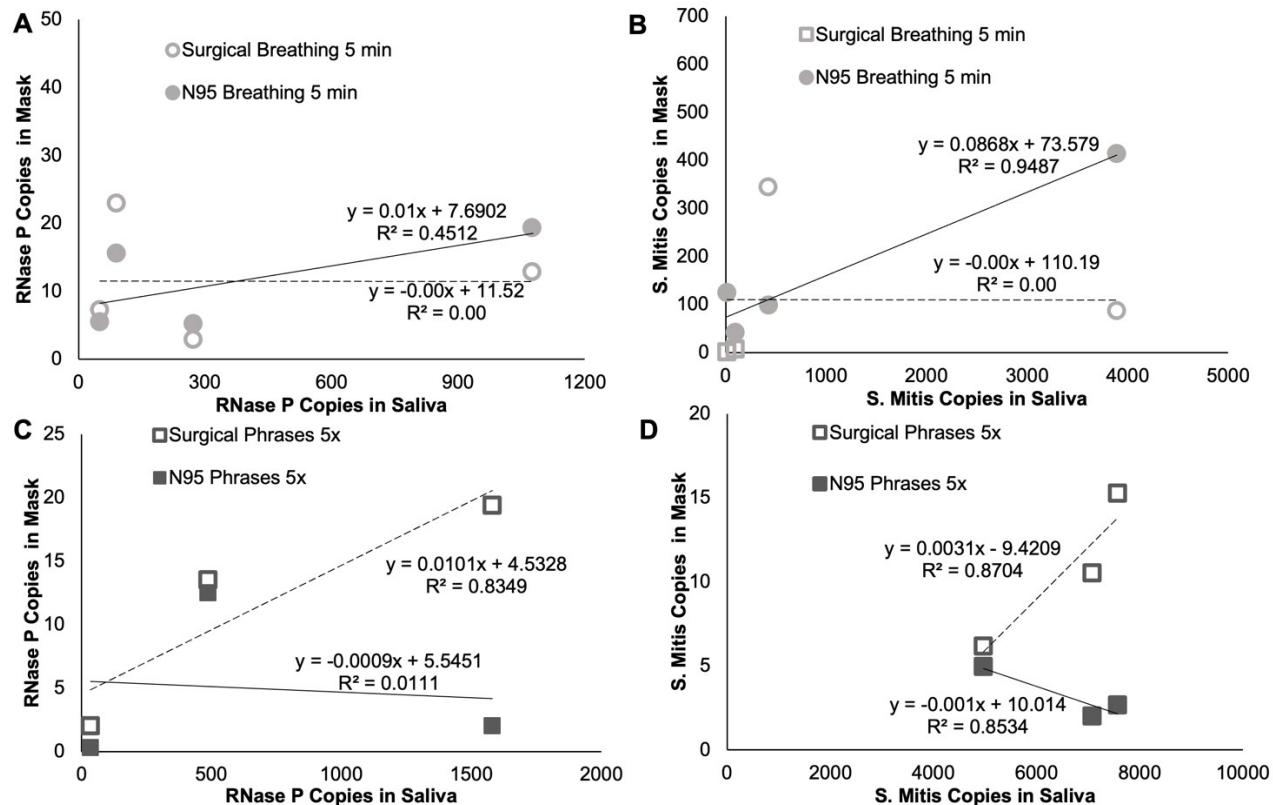

**Fig. 2** Comparison of RNase P (A&C) and *S. mitis* (B&D) copies detected in saliva vs mask type. Plots A&B are of the 5 minute breathing samples and plots C&D are of the 5x speaking samples. Each point is a different individual and trend lines are grouped by mask type with the hollow points and dashed lines representing surgical masks and the solid points and lines representing N95 masks.

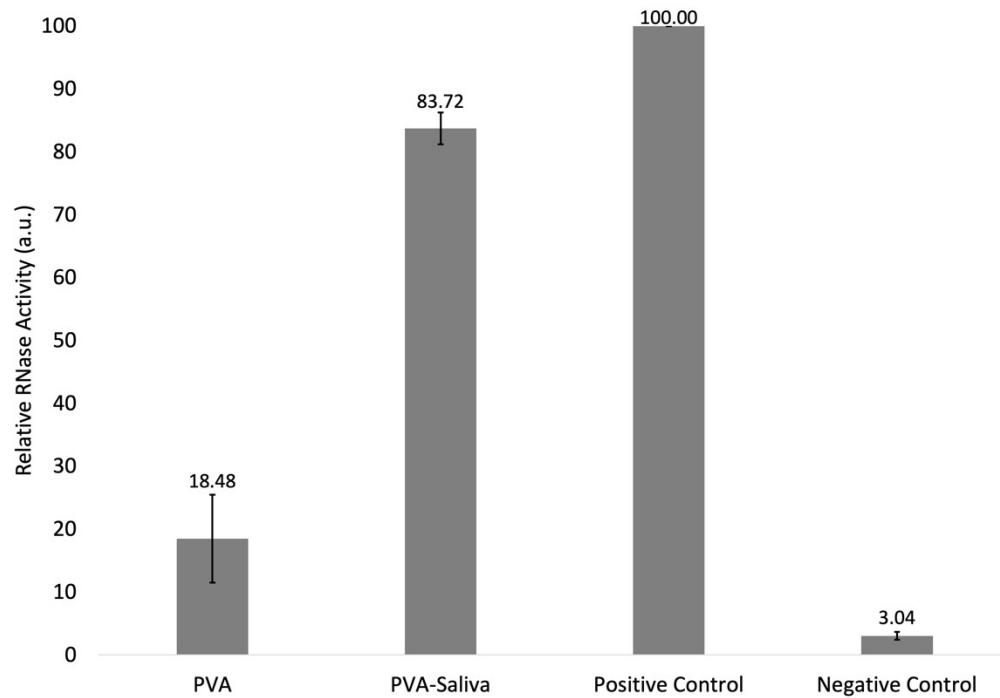

**Fig. S3** Relative RNase activity was tested using an RNaseAlert™ kit from Invitrogen (ThermoFisher Cat AM1964). Electrospun PVA inserts were tested with and without 5  $\mu$ L of saliva spiked on in the same manner as the extraction efficiency was. Inserts were dissolved in 100  $\mu$ L by heating to 60°C and followed by vortexing until dissolved. Negative controls are pure water. Positive controls are RNase A spiked into water. 45  $\mu$ L of sample was mixed with 5  $\mu$ L of RNase Alert™ substrate in replicate and incubated at 37°C for 1 hour at which point endpoint fluorescence was measured on a Qiagen Roto-Gene. Replicates were averaged. All samples are N=3 with S.D. error bars. Note 100 is the max readout of the flourometer so the positive samples were likely >100.
